## **The impact of poverty on mental illness: Emerging evidence of a causal relationship**

*Mattia Marchi*<sup>1,2,3</sup>, *Anne Alkema*<sup>3</sup>, *Charley Xia*<sup>4,5</sup>, *Chris H. L. Thio*<sup>6</sup>, *Li-Yu Chen*<sup>3</sup>, *Winni Schalkwijk*<sup>3</sup>, *Gian M. Galeazzi*<sup>1,2</sup>, *Silvia Ferrari*<sup>1,2</sup>, *Luca Pingani*<sup>1,2</sup>, *Hyeokmoon Kweon*<sup>7</sup>, *Sara Evans-Lacko*<sup>8</sup>, *W. David Hill*<sup>4,5</sup>, *Marco P. Boks*<sup>3</sup>

<sup>1</sup>Department of Biomedical, Metabolic and Neural Sciences, University of Modena and Reggio Emilia, Via Giuseppe Campi, 287 – 41125 Modena, Italy

<sup>2</sup>Department of Mental Health and Addiction Services, Azienda USL-IRCCS di Reggio Emilia, Reggio Emilia, Italy

<sup>3</sup>Department of Psychiatry, Brain Center University Medical Center Utrecht, University Utrecht, Utrecht, The Netherlands

<sup>4</sup>Lothian Birth Cohort studies, University of Edinburgh, 7 George Square, Edinburgh EH8 9JZ, UK

<sup>5</sup>Department of Psychology, University of Edinburgh, 7 George Square, Edinburgh, EH8 9JZ, UK

<sup>6</sup>Department of Epidemiology, University of Groningen, University Medical Centre Groningen, Groningen, the Netherlands

<sup>7</sup>Department of Economics, School of Business and Economics, Vrije Universiteit Amsterdam, 1081 HV Amsterdam, Netherlands

<sup>8</sup>Care Policy and Evaluation Centre, London School of Economics and Political Science, UK

*\*Correspondence:*

*Marco P. Boks*

Department of Psychiatry, Brain Center University Medical Center Utrecht, University Utrecht, Utrecht, The Netherlands

Mail: [m.p.m.boks@umcutrecht.nl](mailto:m.p.m.boks@umcutrecht.nl)

## Abstract

The link between poverty and mental illness has sparked discussions concerning the poverty role as a risk factor for poor mental health. If poverty has as a causal role in mental illness, it would have profound implications for our comprehension of mental well-being and guide efforts to address the increasing incidence of mental health disorders.

Building on the recent breakthrough discovery of heritability of poverty traits and utilizing large-scale genome-wide association studies of mental illness, we used Genomic Structural Equation Modeling (GSEM) and Mendelian randomization (MR) to examine the evidence of a causal relationship between poverty and mental illness. A common factor of poverty was derived from household income (HI), occupational income (OI), and social deprivation (SD). The causal effect of poverty was examined on 9 mental illnesses: attention deficit and hyperactivity disorder (ADHD), anorexia nervosa (AN), anxiety disorders (ANX), autism spectrum disorders (ASD), bipolar disorder (BD), major depressive disorder (MDD), obsessive-compulsive disorder (OCD), post-traumatic stress disorder (PTSD), and schizophrenia (SZ), while accounting for the influence of cognitive ability (CA).

Our analysis highlights HI as the measure of poverty with the strongest correlation with the common factor, when compared to OI and SD. Using the common factor of poverty, bidirectional MR provided evidence that mental illness leads to poverty, consistent with the existing paradigm. What is new is evidence that higher levels of poverty likely pose a causal factor in developing ADHD (Inverse Variance Weighted Odds Ratio per Standard Deviation change [IVW OR]=3.43[95%CI:2.95-3.99]), MDD (IVW OR=1.49[95%CI:1.29-1.72]), and SZ (IVW OR=1.53[95%CI:1.35-1.73]), but exerts a protective effect against AN (IVW OR=0.50[95%CI:0.40-0.62]). The direct effect of poverty on mental illness remained following adjustment for CA, albeit with reduced effect sizes.

Our research indicates that higher poverty levels are likely causal risk factors for MDD and SZ, but protective against AN. Notably, CA explains a significant portion of the impact of poverty, aligning with prior reports that highlight the contribution of impaired cognitive function to severe mental illnesses. Although individuals' skills and abilities tied to earning capacity may be the variables with the actual causal effect of poverty on mental illness, our findings warrant further investigations into interventions targeting poverty and cognitive abilities to advance mental health.

**Keywords:** poverty; deprivation; cognitive ability; mental illness; mendelian randomization

## Introduction

The association between mental illness and social class was first demonstrated in a 1958 study by Hollingshead and Redlich, who found that individuals from lower socioeconomic backgrounds had a higher incidence of severe and persistent mental illness and received less adequate treatment<sup>1</sup>. More than fifty years later, the same social conditions persist, and affect mental health worldwide. Epidemiological studies throughout the world have demonstrated an association between mental health and socio-economic status (SES)<sup>2-4</sup>, with mental illness being more common among people from lower social classes<sup>5,6</sup>. Also, studies on income fluctuations found consistent changes in mental health<sup>7,8</sup>.

Although the association between poverty and mental illness is strong across these studies, there is limited evidence that supports a causal relationship. Several factors, such as reverse causation and residual confounding, make it difficult to determine whether poverty causes mental illness or if it is the other way around and mental illness leads to poverty. However, understanding the causality of the relationship between poverty and mental illness may be crucial for public health policies as they may target essential aspects of poverty and improve public mental health<sup>9</sup>.

To date, uncertainty remains with respect to the direction of the association between poverty and mental illness, and two explanatory hypotheses compete: social causation and social selection<sup>10</sup>. According to the social causation theory, the socio-economic adversity faced by lower socio-economic groups precipitates mental illness in vulnerable individuals possibly mediated by factors such as housing insecurity, substance use, and stress. Conversely, the social selection theory suggests that the overrepresentation of low socio-economic status among people with mental illness is mainly attributable to downward social mobility as a consequence of the impairment associated with poor mental health<sup>11</sup>.

Conducting a randomized controlled trials to determine causality of the role of poverty is not feasible nor ethical. An alternative method to investigate is Mendelian Randomization (MR), which uses genetic data from genome-wide association studies (GWAS) to examine whether a risk factor fits in a causal model for an outcome<sup>12</sup>. MR method takes advantage of the fact that genetic variants are fixed at conception and are less susceptible to the confounding effects that make results from observational studies difficult to interpret<sup>13</sup>.

Such a study on poverty come with a conceptual challenge. Studies on poverty often make use of a single measure, usually based on income recorded at the household level or as individual income or operationalized employment status of an individual, by occupational income<sup>7,11</sup>. However, no single indicator can capture the multiple dimensions of poverty, such as lack of material goods, limited access to education and healthcare services, inadequate living standards, disempowerment, poor quality of work, the threat of violence, and living in areas that are environmentally hazardous, among others<sup>14-17</sup>. For that reason, the UK health authorities commonly use a composite measure known as the Townsend Deprivation Index to assess material deprivation within a population<sup>18</sup>.

In this study, we applied MR to examine the causal effects of poverty on nine mental illnesses. First, to maximize the power required to examine the effects of poverty and its multidimensional aspects, we derived a poverty factor using household income (HI), occupational income (OI), and social deprivation (SD). These three measures capture poverty at the level of the individual, the household, and of the area in which one lives and so facilitate a more informed understanding of which aspects of poverty are those that present the greatest risk to individual level mental health. Second, we investigated the causal relationship of the common factor of poverty and each of the three indicators of poverty with nine mental illnesses: attention deficit and hyperactivity disorder (ADHD), anorexia nervosa (AN), anxiety disorder (ANX), autism spectrum disorder (ASD), bipolar disorder (BD), major

depressive disorder (MDD), obsessive-compulsive disorder (OCD), post-traumatic stress disorder (PTSD), and schizophrenia (SZ). To account for potential confounding effects, we also extended the MR analyses to include cognitive abilities (CA).

## Methods

### Study design and data sources

We conducted a two-sample MR study using summary-level GWAS data that for the most part were publicly available. Ethical approval was obtained in all original studies. MR relies on three main assumptions on the validity of the genetic instrument variable, which are: relevance, independence, and exclusion restriction<sup>19</sup>. These require that the genetic variant 1) must be related to the exposure (i.e., only SNPs that reach genome-wide significance in the association with the exposure, that is  $5e-8$ , are used), 2) it is not correlated with confounders in the exposure–outcome relationship, and 3) affects the outcome only through the risk factor (i.e., “no horizontal pleiotropy” rule). The schematic overview of the study is represented in Figure 1.

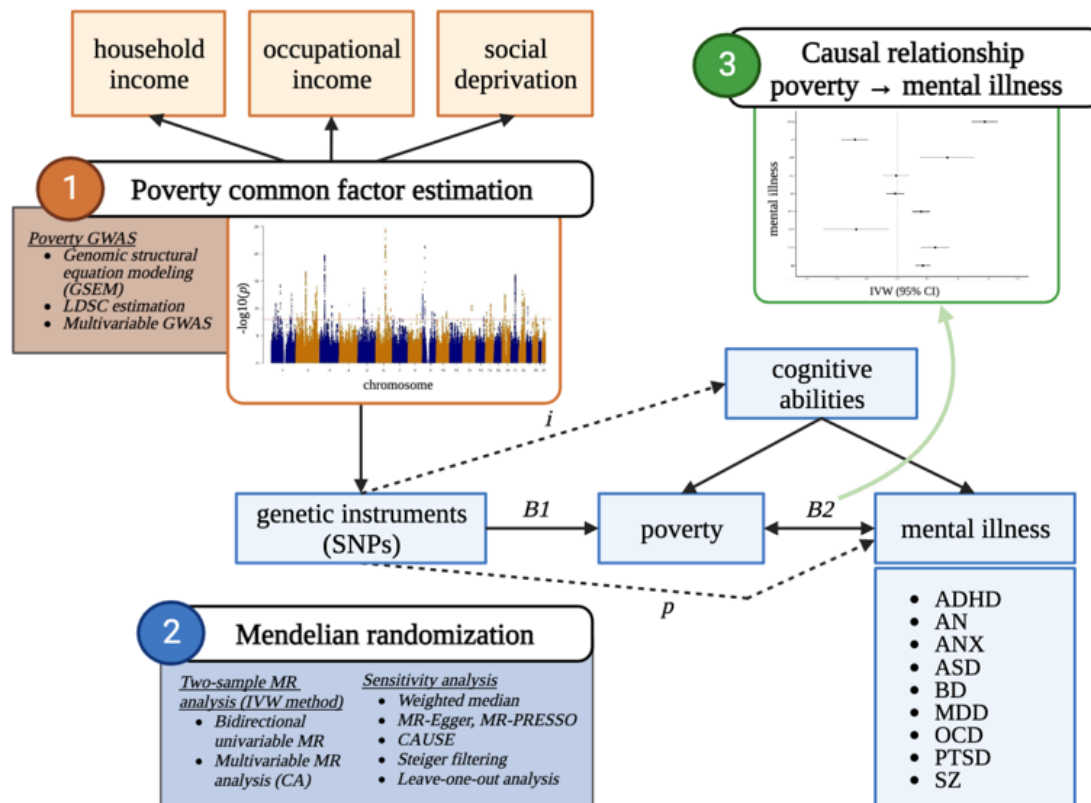

Figure 1: Schematic overview of the research process.

Abbreviations: ADHD: attention deficit hyperactivity disorder; AN: anorexia nervosa; ANX: anxiety disorder; ASD: autism spectrum disorders; BD: bipolar disorder; CA: cognitive abilities; CAUSE: causal analysis using summary effect estimates; IVW: inverse variance weighted; LDSC: multivariable linkage disequilibrium score regression; MDD: major depressive disorder; MR: mendelian randomization; MR-PRESSO: MR pleiotropy residual sum and outlier; OCD: obsessive-compulsive disorder; PTSD: post-traumatic stress disorder; SZ: schizophrenia; SNP: single nucleotide polymorphism.

Legend:  $B1$  is the association between the genetic variants and the exposure of interest (MR relevance assumption);  $i$ : potential violation of the MR independence assumption;  $p$ : potential

pleiotropic effect of the genetic variants on the outcome (i.e., violation of the MR exclusion restriction assumption); B2 is the causal association of interest. The figure was created with BioRender.com.

### *Poverty instruments*

The source of the summary data on HI, SD, and CA can be found in Table 1. A total of 379,598 participants of European ancestry provided genotype data and data on their level of yearly HI before tax. HI was primarily analyzed as a continuous variable. To investigate whether the relation between HI and mental illness is particularly strong at any specific level of income, we further categorized HI as a dichotomous variable, defining the cases in the following way: (1) low HI: being less than £18,000; (2) low-mid HI: being less than £29,999; (3) mid-high HI: being more than £52,000; (4) high HI: being more than £100,000. One GWAS for each HI category versus all the other categories was performed. A total of 440,350 individuals of European ancestry had genotype data and data on their level of SD, measured with Townsend Deprivation index, and it was analyzed as a continuous variable. Finally, GWAS summary data on cognitive ability of 248,482 individuals was included<sup>20</sup>. The CA measure was derived from multiple cohorts that each had administered a battery of cognitive tests to their participants. Correlations between tests of CA are high with estimates between  $r = 0.8$  and  $r = 1.0$  being reported<sup>21,22</sup>. CA was analyzed as a continuous variable. Results from a meta-analysis of two OI GWAS<sup>23</sup>, including UK Biobank and the Health and Retirement Study (the latter involving participants from White American ancestry), were used to generate the instruments for OI which were analyzed as continuous variable. Finally, we estimated a latent factor GWAS of poverty (P) by jointly modelling cross-trait liability of continuous HI, OI, and SD, using Genomic structural equation modeling (GSEM). First, we estimated the Multivariable Linkage Disequilibrium Score Regression (LDSC)<sup>24</sup> across HI, OI, and SD. Then, we combined the LDSC output with the HI, OI, and SD summary statistics to run the multivariable common factor GWAS. This common factor poverty GWAS was built using as unit of identification HI. To allow estimation of poverty - instead of income - in the MR analyses on mental illness, the regression coefficients have been reversed.

### *Mental illness instruments*

Results from the most updated GWAS of ADHD<sup>25</sup>, AN<sup>26</sup>, ANX<sup>27</sup>, ASD<sup>28</sup>, BD<sup>29</sup>, MDD<sup>30</sup>, OCD<sup>31</sup>, PTSD<sup>32</sup>, and SZ<sup>33</sup> were obtained. Two-sample MR method requires minimal sample overlap between exposure and outcome GWAS<sup>34</sup>; therefore, mental illness summary-level data were obtained mainly from the Psychiatric Genomic Consortium (PGC) excluding UK Biobank participants. The GWAS of the mental illness traits considered were provided and analyzed as case/control. The effective sample size across the cohorts contributing to the GWAS meta-analysis was calculated for each trait and ranged from 320k (for SZ) to 10k (for OCD). Table 1 summarizes the GWAS information.

Table 1: GWAS information for each phenotype

| <b>Trait</b>                             | <b>N</b> | <b>N cases</b> | <b>Consortium</b> | <b>First author, Year</b> |
|------------------------------------------|----------|----------------|-------------------|---------------------------|
| Attention Deficit Hyperactivity Disorder | 225,534  | 38,691         | PGC               | Demontis et al., 2023     |
| Anorexia Nervosa                         | 72,517   | 16,992         | PGC               | Watson et al., 2019       |
| Anxiety                                  | 21,761   | 7,016          | PGC               | Otowa et al., 2016        |

|                                |         |        |     |                         |
|--------------------------------|---------|--------|-----|-------------------------|
| Disorder                       |         |        |     |                         |
| Autism Spectrum Disorders      | 46,350  | 18,381 | PGC | Grove et al., 2019      |
| Bipolar Disorder               | 413,466 | 41,917 | PGC | Mullins et al., 2021    |
| Cognitive Abilities            | 248,482 | NA     | UKB | Hill et al., 2018       |
| Household Income               | 379,598 | NA     | UKB | NA                      |
| Major Depressive Disorder      | 138,884 | 43,204 | PGC | Howard et al., 2019     |
| Obsessive-Compulsive Disorder  | 9,725   | 2,688  | PGC | Arnold et al., 2018     |
| Occupational Income            | 282,963 | NA     | NA  | Kweon et al., 2020      |
| Post-Traumatic Stress Disorder | 206,655 | 32,428 | PGC | Nievergelt et al., 2019 |
| Social Deprivation             | 440,350 | NA     | UKB | NA                      |
| Schizophrenia                  | 320,404 | 76,755 | PGC | Trubetskoy et al., 2022 |

Legend: Traits are presented in alphabetical order.

Abbreviations: N: number (e.g., sample size); PGC: Psychiatric Genomics Consortium; NA: not applicable; UKB: UK Biobank.

### *Mendelian Randomization*

The full set of GWAS summary statistics for each exposure was first restricted to the variants reaching the genome-wide significance threshold (i.e.,  $p\text{-value} < 5e-8$ ). Then, to ensure independence between instruments, we applied a strict clumping procedure ( $LD r^2 < 0.001$  within 10 Mb, using the 1000G EUR as the reference panel). Following that, SNP alleles were harmonized between exposure GWAS and outcome GWAS before running MR. We conducted bidirectional univariable MR between each poverty measure and mental illness. The inverse variance weighted (IVW) method was used to estimate effects in the primary analyses<sup>35</sup> and the results were presented using forest plots. The weighted median (WM)<sup>36</sup>, MR Egger regression (MR-Egger)<sup>37</sup>, and MR pleiotropy residual sum and outlier (MR-PRESSO)<sup>38</sup> methods were used as sensitivity analyses, because each method makes different assumptions regarding instrument validity. Specifically, MR-Egger and MR-PRESSO are better than IVW in case of horizontal pleiotropy (i.e., violation of the exclusion restriction assumption). In addition, we used the Causal Analysis Using Summary Effect Estimates (CAUSE)<sup>39</sup> to account for the presence of correlated or uncorrelated pleiotropy (i.e., violation of the independence and exclusion restriction assumptions). Further information on MR-PRESSO and CAUSE is available in the Supplementary File 1. We presented the results of MR analyses as Beta (B) corresponding to the log-odds for binary traits (e.g., mental illness) or to the unstandardized linear regression coefficients for continuous traits (e.g., poverty measures) with their respective 95% confidence intervals



(95% CI). When the outcome of the analysis was binary (i.e., mental illness and HI levels) we also provided a conversion to Odds Ratio (OR) with corresponding 95% CI.

We also conducted leave-one-out analyses to investigate if the effects are driven by one or a subset of the SNPs and investigated whether the instruments represent the correct causal direction using Steiger analyses, including Steiger test and Steiger filtering<sup>40</sup>. Steiger filtering is particularly useful to avoid false positive findings due to reverse causation (i.e., violation of the exclusion restriction assumption). The *mr\_wrapper()* function of the *TwosampleMR* package performs Steiger tests on each SNP, evaluating if the  $R^2$  of the exposure was greater than the  $R^2$  of the outcome, indicating the correct direction of the association. Subsequent Steiger filtering excluded SNPs with false results, allowing MR analyses to be performed on the subset of SNPs with verified associations.

Finally, we hypothesized that CA is a likely confounder in the poverty and mental illness relationship, and our instruments for poverty are possibly related to CA (i.e., violation of the independence assumption). Therefore, we used multivariable MR (MVMR)<sup>19</sup> to estimate the direct effect of poverty on mental illness, independent of CA. For this purpose, we clumped the full list of SNPs from each poverty indicator GWAS (to ensure only independent SNPs are included) and restricted it to those SNPs found in the outcome GWAS, and then ran the analyses on each instruments-mental illness set.

Instrument strength was quantified using the mean F statistic within the univariable IVW analyses, considering a value of  $F < 20$  as indicative of weak instruments<sup>41</sup>.

All the analyses were conducted in R<sup>42</sup>, using the packages *TwosampleMR*<sup>43</sup>, *CAUSE*<sup>39</sup>, and *GenomicSEM*<sup>44</sup>. The significance threshold was  $p < 0.05$ . Since there is only one relationship that is tested - that between poverty and mental illness - we did not apply a multiple testing p-value correction.

## Results

### *Latent poverty-factor estimation*

To analyze the joint genetic architecture of poverty we ran a multivariable GWAS for which a common factor defined by genetic indicators is regressed on a SNP. This allows for estimation of a set of summary statistics for the common factor that represent the SNP effects on the common factor. The multivariable GWAS of the latent poverty factor (P) was modelled from three indicators: household income, social deprivation, and occupational income. Specifically, indicators were ordered such that the phenotype with the largest, unstandardized loading on the common factor is listed first, that led to set household income as the unit load identification (see Supplementary Table 1 showing the factor loading of each indicator). The heritability of the common factor GWAS was estimated with the  $h^2$  and resulted around 8.4%. Mean  $\chi^2$ , LDSC intercept, and  $h^2$  for the common factor GWAS and GWAS of HI, SD, and OI are presented in Supplementary Table 2.

The GWAS of the latent poverty factor identified 99 significantly associated independent loci at GWAS threshold ( $p\text{-value} \leq 5e-8$ ), as displayed in Figure 2 (see also Supplementary File 2 for the lead SNPs list). The full GWAS summary statistics are available upon reasonable request to the lead author (MM).

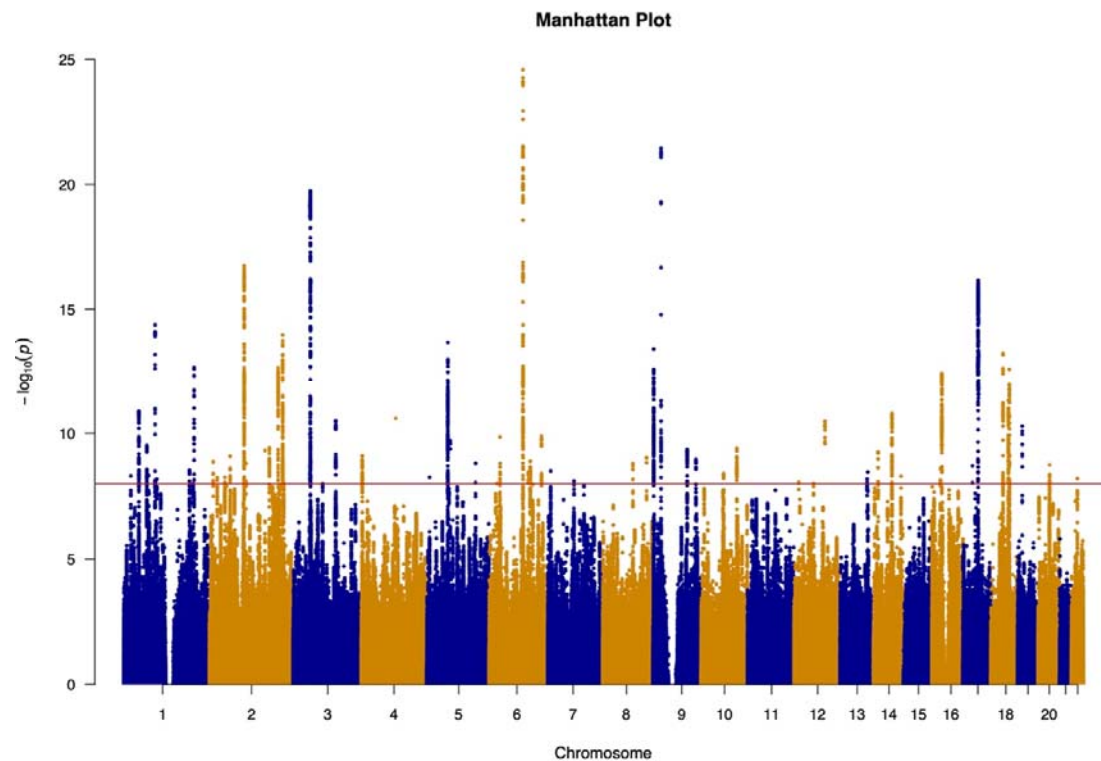

Figure 2: Manhattan plot of the latent poverty factor.

Legend: The x-axis indicates chromosomal position and the y-axis is the significance of association ( $-\log_{10}(p\text{-value})$ ). The red line represents genome-wide significance level ( $5 \times 10^{-8}$ ).

The genetic correlation between P and CA was strong ( $r_g$  was 0.74; see Supplementary Table 3). Running bidirectional MR of CA against P, we found stronger evidence supporting the causal effect of CA on P (IVW  $B_{CA \rightarrow P} = -0.390$  [95% CI: -0.408; -0.372]) rather than vice versa (IVW  $B_{P \rightarrow CA} = -0.987$  [95% CI: -1.03; -0.939]), as suggested by the results of Steger's test ( $p < 0.001$ ;  $p = 0.811$ , respectively). The full results are presented in Supplementary Table 4 and Supplementary Figures 1-4.

#### *Bidirectional univariable MR of common factor poverty against mental illness*

For the univariable analyses, the mean F statistic ranged from 35.3 to 45.6, indicating that the estimates were not likely subject to weak instrument bias. Forward IVW analysis of P against the considered mental illnesses showed significant causal effect of P on ADHD ( $B = 1.23$  [95% CI: 1.08; 1.38]), ANX ( $B = 0.831$  [95% CI: 0.377; 1.28]), MDD ( $B = 0.398$  [95% CI: 0.254; 0.542]), PTSD ( $B = 0.629$  [95% CI: 0.395; 0.863]), SZ ( $B = 0.425$  [95% CI: 0.300; 0.550]), and with opposite direction on AN ( $B = -0.697$  [95% CI: -0.918; -0.477]) and OCD ( $B = -0.676$  [95% CI: -1.22; -0.137]). The estimate of the causal effect using WM method, was consistent in the magnitude for ADHD, AN, MDD, PTSD, and SZ, but not for ANX and OCD. We did not identify any significant causal effect of P on BD and ASD.

Backward IVW analysis of mental illness against P showed significant causal effect of ADHD ( $B = 0.111$  [95% CI: 0.096; 0.126]), BD ( $B = -0.026$  [95% CI: -0.037; -0.014]), and SZ



( $B=0.023$  [95%CI: 0.017; 0.029]) on P. The estimate of the causal effect using WM method, was confirmed for both ADHD and SZ, but not for BD.

The results are displayed in Figure 3 (see also scatterplots displayed in Supplementary Figures 5-13 and Supplementary Figures 23-26), and in the Supplementary Table 5 (see also Supplementary Table 6 for conversion to OR).

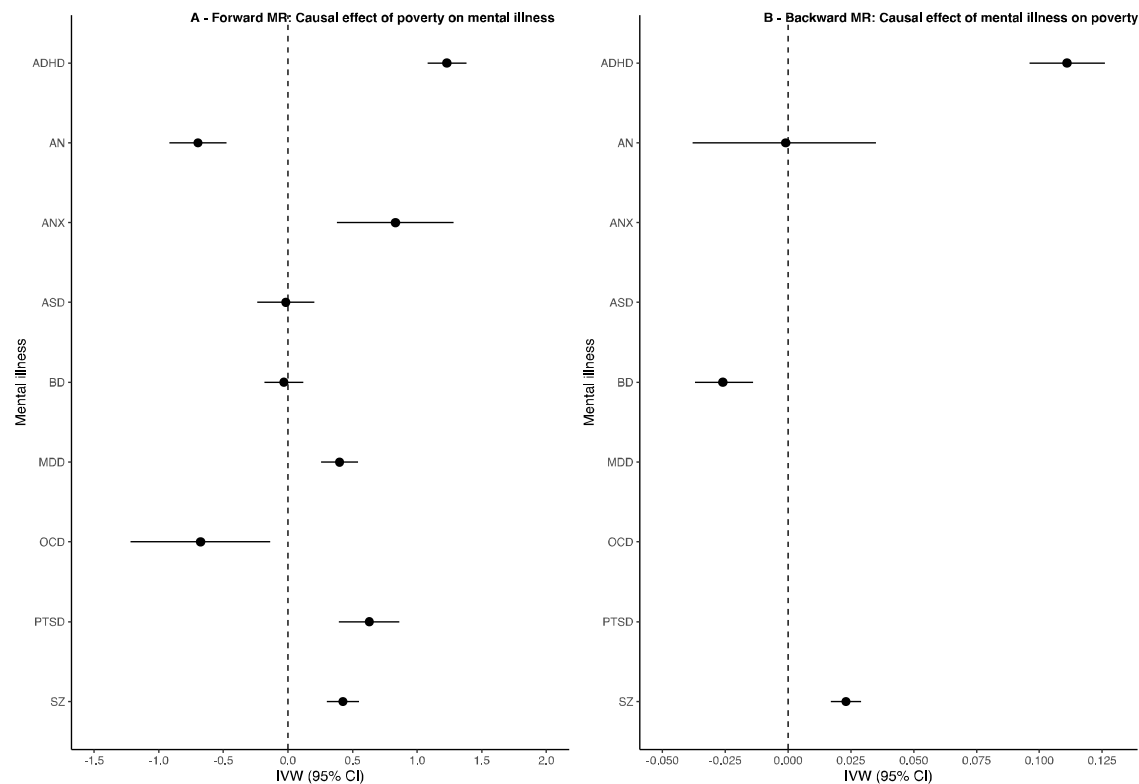

Figure 3: Forest plot of the results of univariable bidirectional Mendelian randomization analysis of poverty against mental illness (Panel A: forward analysis; Panel B: backward analysis)

Abbreviations: Fw: forward MR analysis; Bw: backward MR analysis; ADHD: attention deficit hyperactivity disorder; AN: anorexia nervosa; ANX: anxiety disorder; ASD: autism spectrum disorders; BD: bipolar disorder; MDD: major depressive disorder; OCD: obsessive-compulsive disorder; PTSD: post-traumatic stress disorder; SZ: schizophrenia; MR: mendelian randomization; SNP: single nucleotide polymorphism; IVW: inverse variance weighted (fixed effect); 95% CI: 95% confidence interval.

Legend: Poverty is a latent variable built using household income as unit identification, therefore an increase in the indicator's load stands for increased income, therefore the regression coefficients have been reversed to facilitate interpretation of the effect of poverty. The effect estimates on the x-axis are log-odds for binary traits (i.e., for mental illnesses) and unstandardized linear regression coefficient for continuous traits (i.e., for poverty).

Steiger test indicated that the causal direction between the exposure and outcome was correct in all the analyses. Cochran's Q heterogeneity statistics was significant in all the analyses (except for the effect of P on ANX), which is suggestive of pleiotropy. Furthermore, we looked at MR-Egger intercept, which was significantly deviating from 0 in the analysis of P against ADHD ( $p<0.001$ ) and of P against ASD ( $p=0.015$ ), suggesting that pleiotropy was

unbalanced in these relationships. The MR-Egger causal effect, which provides better estimate in case of unbalanced pleiotropy than IVW MR, yielded opposite results for the effect of P on ADHD ( $B=-1.12$  [95%CI: -2.21; -0.019]) and evidence of inverse relationship between P and ASD ( $B=-1.79$  [95%CI: -3.23; -0.348], Egger's intercept  $p=0.015$ ). MR-PRESSO did not detect bias in the estimates due to horizontal pleiotropy in all the estimates. CAUSE analysis confirmed the causal effect of P on ADHD bidirectionally, and unidirectionally on AN, MDD, and PTSD. No significant difference between the sharing and the causal model was found for the effect of P on SZ bidirectionally. The results of CAUSE are presented in Supplementary Table 7.

Leave-one-out analyses, both in forward and backward directions, showed that the direction of the effect of each SNP is consistent with the direction of the overall causal estimate. In addition, for most of the analyses, a change in the estimations of less than 10% was obtained by leaving out each SNP, suggesting that none of the genetic variants were overly influential. The results of leave-one-out analyses are available as Supplementary Figures 14-22 and Supplementary Figures 27-29. Finally, to test if our results were robust to bias due to reverse causality, we repeated the MR analyses on a subset of SNPs selected through Steiger filtering. This sensitivity analysis confirmed the results of the main analysis, except for the effect of P on OCD that was no longer significant after Steiger filtering ( $B=-0.037$  [95%CI: -0.702; 0.628]) and for the MR-Egger analysis of P on ADHD ( $B=-0.976$  [95%CI: -1.94; 0.009]), suggesting that the relationship between P and ADHD is likely biased from reverse causation and unbalanced pleiotropy (as suggested by the Egger's intercept test,  $p<0.001$ ). The results are presented in Supplementary Table 8.

To further explore whether the effect of poverty on mental illness is driven by specific indicators, we performed bidirectional univariable MR using each of the poverty indicators (i.e., HI, OI, and SD) as the exposure. The results are presented in Figure 4, Supplementary Tables 9-10 (HI), 13-14 (OI), 17-18 (SD), and Supplementary Figures 30-107. The HI GWAS had a higher level of power than OI and SD GWASs, as indicated by the number of SNPs selected for the analyses (~50, ~30, and ~10, respectively).

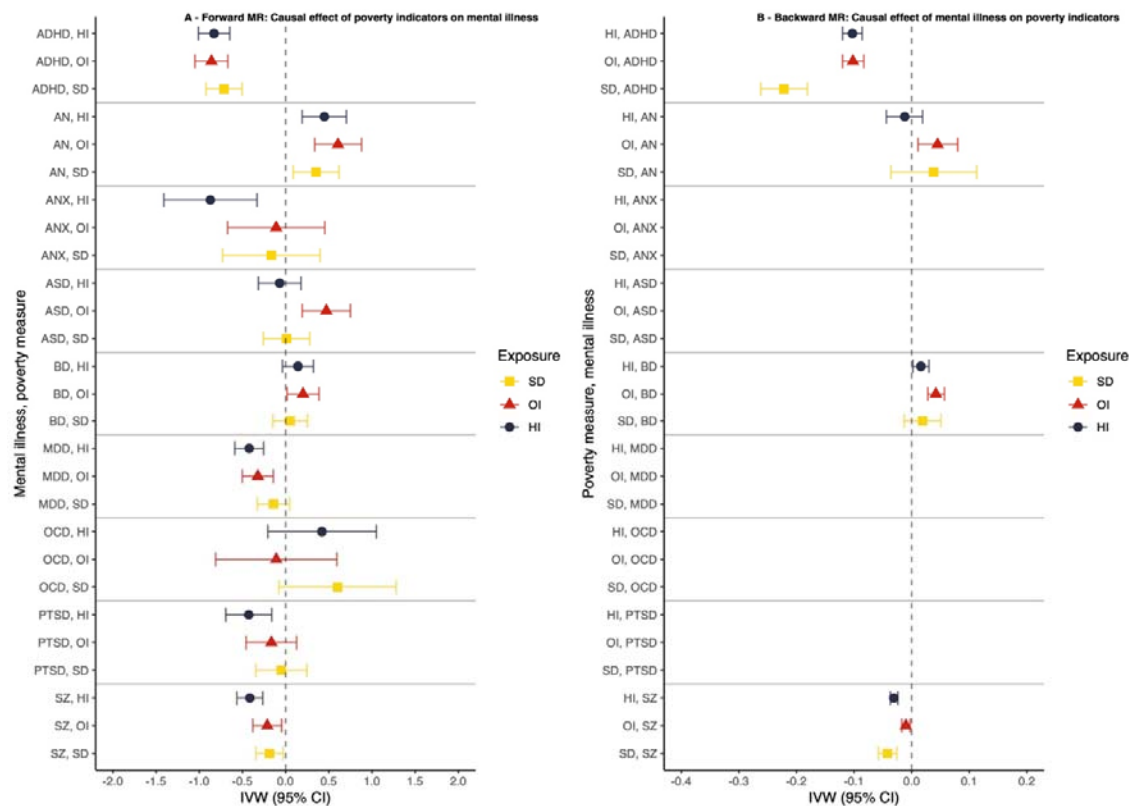

Figure 4: Forest plot of the results of univariable bidirectional Mendelian randomization analysis for each poverty measure against mental illness (Panel A: forward analysis; Panel B: backward analysis)

Abbreviations: Fw: forward MR analysis; Bw: backward MR analysis; ADHD: attention deficit hyperactivity disorder; AN: anorexia nervosa; ANX: anxiety disorder; ASD: autism spectrum disorders; BD: bipolar disorder; MDD: major depressive disorder; OCD: obsessive-compulsive disorder; PTSD: post-traumatic stress disorder; SZ: schizophrenia; HI: household income; OI: occupational income; SD: social deprivation; MR: mendelian randomization; SNP: single nucleotide polymorphism; IVW: inverse variance weighted (fixed effect); 95% CI: 95% confidence interval.

Legend: To have a consistent direction of the effect, social deprivation effect has been reversed. The effect estimates on the x-axis are log-odds for binary traits (i.e., for mental illnesses) and unstandardized linear regression coefficient for continuous traits (i.e., for the poverty indicators).

Overall, the direction of the associations obtained using the poverty common factor was consistent with those obtained for each indicator, where bidirectional causal effects of poverty on some mental illnesses was observed. Specifically, using HI as a poverty measure, we found evidence of bidirectional effect on ADHD ( $B=-0.830$  [95%CI: -1.01; -0.647];  $B=-0.103$  [95%CI: -0.120; -0.086], IVW forward and backward respectively) and SZ ( $B=-0.415$  [95%CI: -0.565; -0.265];  $B=-0.031$  [95%CI: -0.037; -0.024], IVW forward and backward respectively), and unidirectional causal effect to MDD ( $B=-0.422$  [95%CI: -0.589; -0.255]) and AN ( $B=0.448$  [95%CI: 0.191; 0.704]). However, the effect of HI on ADHD was biased by high heterogeneity and unbalanced pleiotropy (Egger's intercept  $p<0.001$ ), with MR-Egger estimate yielding inconsistent results ( $B=0.606$  [95%CI: -0.684; 1.90]). The bidirectional effect of OI on ADHD ( $B=-0.859$  [95%CI: -1.05; -0.669];  $B=-0.102$  [95%CI: -0.120; -0.083],

IVW forward and backward respectively) and unidirectionally to AN ( $B=-0.187$  [95%CI: -0.344; -0.030]) and MDD ( $B=-0.322$  [95%CI: -0.502; -0.143]) were confirmed also using OI as a measure of poverty. The effect of OI on SZ was also confirmed bidirectionally ( $B=-0.187$  [95%CI: -0.344; -0.030];  $B=-0.010$  [95%CI: -0.017; -0.003]), but sensitivity analyses using CAUSE and Steiger filtering selection detected potential bias due to pleiotropy in the forward analysis. Notably, also the effect of OI and ADHD changed after Steiger filtering, with evidence of pleiotropy (Egger's intercept,  $p=0.033$ ) and not significant MR-Egger estimate ( $B=0.094$  [95%CI: -1.36; 1.55]). Backward analyses using OI as the outcome, confirmed the effect of BD on poverty using IVW but not WM methods ( $B=0.042$  [0.028; 0.057];  $B=0.020$  [95%CI: -0.005; 0.046], IVW and WM respectively) as found using the common factor poverty; but novel evidence was found to the causal effect of AN to OI ( $B=0.045$  [95%CI: 0.011; 0.080]), not replicated using the poverty common factor or other measures of poverty. Finally, using SD as a measure of poverty, the bidirectional effect on SZ ( $B=0.213$  [95%CI: 0.046; 0.380];  $B=0.042$  [95%CI: 0.026; 0.058], IVW forward and backward respectively) and the unidirectional effect to AN ( $B=-0.352$  [95%CI: -0.618; -0.087]) were confirmed. The bidirectional effect of SD on ADHD was also replicated ( $B=0.713$  [95%CI: 0.504; 0.922];  $B=0.222$  [95%CI: 0.181; 0.262], IVW forward and backward respectively), with stronger evidence for the reverse effect as indicated by Steiger test (forward,  $p=0.079$ ; backward,  $p<0.001$ ). However, by applying the Steiger filtering selection, the effect of SD on ADHD held strong ( $B=0.557$  [95%CI: 0.331; 0.784]). None of the other effects of SD remained significant after Steiger filtering, which is consistent with potential bias due to reverse causation in the relationship between SD and mental illness (for the CAUSE and Steiger filtering MR results see Supplementary Tables 11-12 [HI], 15-16 [OI], 19-20 [SD]).

#### *Bidirectional univariable MR of household income categories against mental illness*

To explore the shape of the relationship between HI and mental health, and specifically to answer the question whether there is a particular HI threshold at which the effect of HI on mental health kicks-in, we used GWAS data for the HI categories and investigated the effect of each category on the considered mental illnesses. That led to the creation of 4 dichotomous dummy variables, consisting of: (1) low HI (LHI): cases were those  $<£18k$ , controls were those  $\geq£18k$ ; (2) low-mid HI (LMHI): cases were those  $<£29.99k$ , controls were those  $\geq£29.99k$ ; (3) mid-high HI (MHHI): cases were those  $>£52k$ , controls were those  $\leq£52k$ ; (4) high HI (HHI): cases were those  $>£100k$ , controls were those  $\leq£100k$ . For each of these bidirectional univariable MR was performed.

As can be seen in Figure 5 and Supplementary Tables 21-24 (see also Supplementary Table 25 for conversion to OR), we found a significant causal effect of being in the lowest HI class on ANX ( $B=0.628$  [95%CI: 0.095; 1.16]), BD ( $B=0.306$  [95%CI: 0.125; 0.487]), MDD ( $B=0.351$  [95%CI: 0.189; 0.513]), PTSD ( $B=0.506$  [95%CI: 0.253; 0.759]), and bidirectionally on ADHD (forward,  $B=0.610$  [95%CI: 0.415; 0.805]; backward,  $B=0.210$  [95%CI: 0.170; 0.250]) and SZ (forward,  $B=0.648$  [95%CI: 0.488; 0.808]; backward,  $B=0.082$  [95%CI: 0.066; 0.098]). In the LMHI class, the direction of the associations observed in the LHI was maintained, and interestingly, the effect size decreased, consistent with our leading hypothesis of more deleterious effect of poverty on mental health at very low levels of income. Exceptions were AN, ASD, and OCD for which being in the LMHI class resulted to be protective ( $B=-0.309$  [95%CI: -0.526; -0.091],  $B=-0.268$  [95%CI: -0.488; -0.047],  $B=-0.774$  [95%CI: -1.34; -0.212], respectively). The analyses in the higher classes (i.e., MHHI and HHI) showed that with each incremental increase or decrease of income there is a corresponding effect on mental illness. For instance, AN and ASD - but not OCD - resulted causally associated with higher incomes, with stronger evidence for AN ( $B_{MHHI\rightarrow AN}=0.371$  [95%CI: 0.193; 0.550];  $B_{MHHI\rightarrow ASD}=0.480$  [95%CI: 0.303; 0.658];  $B_{HHI\rightarrow AN}=0.333$  [95%CI:

0.065; 0.600];  $B_{HHI \rightarrow ASD} = 0.094$  [95% CI: -0.121; 0.308]), whereas the association with ADHD, MDD, PTSD, and SZ resulted with opposite sign, confirming the causal relationship with lower income. Notably, ADHD and SZ showed a consistent bidirectional pattern across income levels, where a lower income was causally related to, and resulted also causal factors for lower incomes. This evidence is supporting a vicious circle between poverty and severe mental illness that reiterates.

The effect of the HI levels on BD showed a U-shape distribution, resulting causally associated with both low and high HI ( $B_{LHI \rightarrow BD} = 0.306$  [95% CI: 0.125; 0.487];  $B_{MHHI \rightarrow BD} = 0.179$  [95% CI: 0.053; 0.304];  $B_{HHI \rightarrow BD} = 0.608$  [95% CI: 0.423; 0.792]). However, these associations were not replicated using the WM method, and MR-PRESSO detected significant distortion in the estimate due to pleiotropy in the relationship between BD and MHHI, with outlier adjusted causal estimates (OACE) resulting not significant (OACE = 0.002 [95% CI: -0.039; 0.042]). The estimate of the causal effect using WM method, was consistent in the magnitude for LHI to ADHD and SZ forward and backward, unidirectionally on ANX, MDD, PTSD, and for MHHI and HHI on ASD.

Q statistics were suggestive of high levels of heterogeneity in most of the analyses, however, MR-Egger showed significant intercept and causal effect only for the relationship between MHHI and BD ( $B = 1.69$  [95% CI: 0.376; 3.00]; Egger's intercept  $p = 0.033$ ). Steiger test indicated that the causal direction between the exposure and outcome was correct in all the analyses except those on ASD ( $p = 0.994$  and  $p = 0.057$  respectively for the association with MLHI and MHHI).

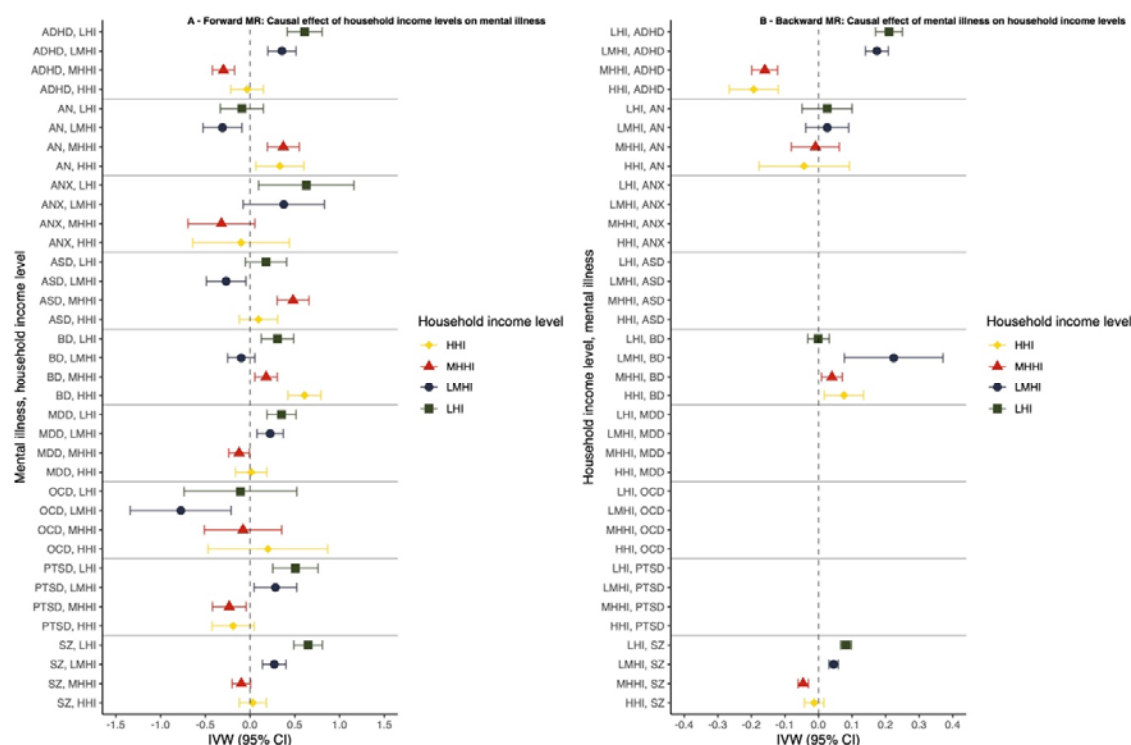

Figure 5: Forest plot of the results of univariable bidirectional Mendelian randomization analysis of household income levels against mental illnesses (Panel A: forward analysis; Panel B: backward analysis)

Abbreviations: Fw: forward MR analysis; Bw: backward MR analysis; LHI: low household income; LMHI: low-mid household income; MHHI: mid-high household income; HHI: high household income; ADHD: attention deficit hyperactivity disorder; AN: anorexia nervosa;



ANX: anxiety disorder; ASD: autism spectrum disorders; BD: bipolar disorder; MDD: major depressive disorder; OCD: obsessive-compulsive disorder; PTSD: post-traumatic stress disorder; SZ: schizophrenia; MR: mendelian randomization; SNP: single nucleotide polymorphism; IVW: inverse variance weighted (fixed effect); 95% CI: 95% confidence interval.

Legend: LHI: low household income, cases <£18,000 – controls ≥£18,000; LMHI: low-mid HI, cases <£29,999 – controls ≥£30,000; MHHI: mid-high HI, cases >£52,000 – controls ≤£52,000; HHI: high HI, cases >£100,000 – controls ≤£100,000. The effect estimates on the x-axis are log-odds for both the forward and backward analyses given that all traits are binary.

Finally, to test if our results were robust to bias due to reverse causality, we repeated the MR analyses on a subset of SNPs selected through Steiger filtering. This sensitivity analysis confirmed a stronger causal effect played by the lowest HI level on ADHD, MDD, PTSD, and SZ. The protective effect of MHHI on ASD also was confirmed. Interestingly, the effect observed in the main analysis were not confirmed for BD and AN. The results can be found in Supplementary Table 26.

#### *MVMR of poverty factor and CA against mental illness*

Like other measures of socioeconomic status, genetic effects are unlikely to influence poverty directly. Rather, genetic effects are likely to influence poverty through intermediary traits (such as health, personality, intelligence, and other characteristics) that are themselves heritable<sup>45</sup>. Previous studies have shown that cognitive ability (referred to as general cognitive function, performance, or as intelligence) is one likely causal factor in both income differences<sup>45</sup> as well as being genetically associated with mental illness<sup>20</sup>. MVMR was used to estimate the effect of poverty on each mental illness, while controlling for cognitive ability. First, bidirectional univariable MR of CA on mental illness was performed, finding evidence supporting a bidirectional inverse causal relationship between CA and ADHD (B=-0.638 [95%CI:-0.720; -0.556]; B=-0.151 [95%CI:-0.172; -0.131], forward and backward direction, respectively) and SZ (B=-0.297 [95%CI:-0.365; -0.228]; B=-0.055 [95%CI:-0.063; -0.047], forward and backward direction, respectively), unidirectional negative causal effect of CA on MDD and PTSD (B=-0.140 [95%CI:-0.215; -0.065] and B=-0.139 [95%CI:-0.264; -0.013], respectively) and unidirectional causal effect of CA on AN and ASD (B=0.306 [95%CI:0.190; 0.422] and B=0.310 [95%CI:0.193; 0.427], respectively). The results are displayed in Supplementary Tables 27-30, and Supplementary Figures 108-133. MVMR analysis yielded results supporting a causal effect of P on ADHD, AN, ANX, MDD, OCD, PTSD, and SZ, beyond CA. Still, the effect of P on mental illness decreased when including CA in the model. These results suggest that the univariable MR results of P on mental illness are slightly biased by CA, a direct effect of P on ADHD, AN, and ANX remains, nonetheless. The results of MVMR are shown in Table 2.

Table 2: Multivariable Mendelian Randomization results of poverty and cognitive abilities on mental illness

| <b>MVMR</b>          | <b>N SNP</b> | <b>IVW B (95% CI)</b>   | <b>p-value</b> |
|----------------------|--------------|-------------------------|----------------|
| <i>Outcome: ADHD</i> | 211          |                         |                |
| Exposure 1: P        |              | 0.834 (0.606; 1.06)     | <0.001         |
| Exposure 2: CA       |              | -0.499 (-0.363; -0.634) | <0.001         |
| <i>Outcome: AN</i>   | 213          |                         |                |
| Exposure 1: P        |              | -0.406 (-0.668; -0.144) | 0.002          |
| Exposure 2: CA       |              | 0.158 (0.003; 0.313)    | 0.046          |



|                                                         |     |                                                 |                 |
|---------------------------------------------------------|-----|-------------------------------------------------|-----------------|
| <i>Outcome: ANX</i><br>Exposure 1: P<br>Exposure 2: CA  | 213 | 0.411 (0.024; 0.798)<br>-0.290 (-0.518; -0.062) | 0.038<br>0.013  |
| <i>Outcome: ASD</i><br>Exposure 1: P<br>Exposure 2: CA  | 216 | 0.127 (-0.147; 0.401)<br>0.208 (0.045; 0.370)   | 0.363<br>0.012  |
| <i>Outcome: BD</i><br>Exposure 1: P<br>Exposure 2: CA   | 216 | 0.057 (-0.165; 0.280)<br>-0.005 (-0.137; 0.128) | 0.614<br>0.947  |
| <i>Outcome: MDD</i><br>Exposure 1: P<br>Exposure 2: CA  | 216 | 0.266 (0.102; 0.429)<br>-0.093 (-0.190; 0.004)  | 0.001<br>0.060  |
| <i>Outcome: OCD</i><br>Exposure 1: P<br>Exposure 2: CA  | 216 | -0.682 (-1.17; -0.196)<br>0.304 (0.015; 0.594)  | 0.006<br>0.040  |
| <i>Outcome: PTSD</i><br>Exposure 1: P<br>Exposure 2: CA | 216 | 0.477 (0.253; 0.701)<br>-0.159 (-0.293; -0.025) | <0.001<br>0.020 |
| <i>Outcome: SZ</i><br>Exposure 1: P<br>Exposure 2: CA   | 216 | 0.345 (0.082; 0.609)<br>-0.306 (-0.464; -0.148) | 0.010<br><0.001 |

Abbreviations: MVMR: multivariable Mendelian randomization; SNP: single nucleotide polymorphism; IVW: multivariable mendelian randomization via inverse variance weighted method (random effects); B: effect estimates are log-odds; 95% CI: 95% confidence intervals; ADHD: attention deficit hyperactivity disorder; P: poverty; CA: cognitive abilities; AN: anorexia nervosa; ANX: anxiety disorder; ASD: autism spectrum disorder; BD: bipolar disorder; MDD: major depressive disorder; OCD: obsessive-compulsive disorder; PTSD: post-traumatic stress disorder; SZ: schizophrenia

Legend: Poverty is a latent variable built using household income as unit identification, therefore an increase in the indicator's load stands for increased income, therefore the regression coefficients have been reversed to facilitate interpretation of the effect of poverty.

Importantly, and unlike the univariable models, the inclusion of CA in a MVMR model produced highly dissimilar results comparing between the poverty factor and each indicator of poverty. First, the inclusion of CA in a MVMR model removed the effect of HI on mental illness. Second, for both OI and SD some significant effects remained where OI demonstrated a direct effect on ASD and SD showed a direct effect on AN. The results of these additional MVMR models are shown in Supplementary Tables 30-33. Taken together these results support the idea that the majority of the genetic effects that link poverty to mental illness do act on CA. However, by utilizing a general factor of poverty the resulting increase in statistical power facilitated the discovery of genetic effects acting to link poverty to mental health independent of the effects of CA.

## Discussion

Building on data of 14 GWAS this study provides support of a causal relationship between poverty and mental illness. Jointly modeling different indicators of poverty using Genomic structural equation modeling, and subsequent MR, provided converging evidence supporting the bidirectional causal effect of poverty on ADHD and SZ, a unidirectional causal effect of

poverty on MDD and an inverse causal relationship between poverty and AN. Notably, the evidence of causal relationship between poverty and ADHD was stronger for reverse causation (ADHD leading to poverty) rather than direct causality. These findings complement previous evidence of social inequalities in mental health across different countries, sample sizes, and study designs<sup>2,7,11,46,47</sup>, but for the first time adds evidence that this relation is not merely an association caused by reversed causality (mental illness leading to poverty), but also of a causal role of poverty leading to mental illness. While this is not completely contra-intuitive, this study presents a first but important piece of evidence.

This study builds on genetic evidence but whilst poverty and other measures of socioeconomic status are heritable traits, it is very unlikely that there are direct genetic effects. Genetic associations with socioeconomic traits are likely the result of vertical pleiotropy. Vertical pleiotropy describes instances where one trait is causally associated with a second trait. In these cases, the genetic effects that act on the first trait will also be detected as being associated on the second<sup>48</sup>. In that context, MR can best be viewed as a way to approximately randomly assigned heritable traits that give rise to income differences. Two key candidates of such underlying traits are intelligence and personality. For example, intelligence may lead to both educational advantage and socioeconomic success as well as more healthy behaviors and lead to good mental health<sup>49-53</sup>. In this study we adjusted for cognitive ability and made two additional discoveries. First, when examining each of the indicators of poverty separately, controlling for CA removed the causal effect of HI on mental illness. For both OI and SD most of the evidence of a direct causal effect of poverty was absent after adjusting for CA however, lower levels of OI remained causally associated with increases in ADHD and higher SD remained in an inverse association with AN. Second, whilst controlling for CA the causal effect of the general factor of poverty reduced by around 30% compared with univariate estimates indicating the CA was a major contributor to the causal association between poverty and mental illness. However, the high power obtained by using the common factor of poverty facilitated the influence of the other heritable poverty traits above and beyond the role of CA and enabled detection of the causal role of poverty on mental health. Of note is the vast literature showing that health characteristics such as obesity, physical appearance, and mental state can influence economic outcomes including employment opportunities or wages<sup>54-56</sup>. Therefore, our results of a causal effect of poverty on mental illness should not be taken as proof supporting genetic determinism, but rather as epidemiological evidence of the detrimental effects of poverty and socio-economic inequalities on mental health, regardless of the mechanisms (see also the Frequently Asked Questions [FAQ] in the Supplementary File 3).

The causal relationship between poverty and mental illness is likely to involve material, psychological, behavioral, and biological pathways. For example, the level of development of the welfare system may be a material mediator to the health-damaging effects of income losses<sup>57,58</sup>. Psychosocial mechanisms are a result of the interaction between people's social environment and their feelings: living on low income is stressful, and at the same time people in disadvantaged situations may have fewer resources to cope with difficult circumstances. Increasingly, biological research is providing evidence showing how experiences such as social defeat can "get under the skin" causing biochemical changes in the body and brain and increasing the risk of developing mental health problems<sup>59,60</sup>. Other contributing factors to the relation between poverty and mental illness are the negative health behaviors that are more prevalent in socially disadvantaged groups<sup>61</sup>, likely as a consequence of the higher cost of healthy behaviors. For example, a healthy diet is more expensive than processed foods, and joining a gym or sporting clubs can be costly. Moreover, unhealthy behaviors such as smoking or drinking alcohol may be used as coping strategies for stressful situations<sup>62</sup>. This aligns with the findings of our analysis on income categories, indicating that poverty does not

have a continuous impact. Instead, experiencing extreme poverty is associated with an increased risk of mental illness.

Previous quasi-experimental research using natural experiments, such as on the lottery winner population, provided supportive evidence for causal relations between SES and mental health, although with small effect sizes<sup>63</sup>. The effect sizes in this study type were moderate for the effect of poverty on ADHD, and small for the other relations.

### *ADHD*

Our finding of a causal association between poverty and ADHD is consistent with previous evidence that poverty has a greater impact on the development of mental illness in children and adolescents<sup>64</sup>. It is important to note that the causal association between ADHD and poverty is subject to some uncertainty regarding the potential influence of reverse causation and pleiotropic effects. Since ADHD is generally recognized as a neurodevelopmental disorder, the observed association with lower CA assumes particular significance as a potential mechanism linking ADHD to socioeconomic disadvantage. Furthermore, the evidence of bidirectional causality between poverty and ADHD could also result from the intergenerational deleterious effects of poverty. For example, parental income may influence children's health and children's poor health may, in turn, impact their educational outcomes<sup>65</sup>.

### *Anorexia nervosa*

A limited number of studies have previously indicated that AN is more prevalent among affluent Western cultures<sup>66</sup>. A recent cohort study in Denmark found that high parental SES was associated with an increased risk of AN among offspring<sup>67</sup>, in line with our results. The same study also found that parental SES had a weaker association with Bulimia Nervosa and unspecified eating disorders in offspring, suggesting that parental SES has different effects on AN than on other eating disorders<sup>67</sup> or eating disorders as a whole<sup>68,69</sup>. A recent review of the literature found that industrialization and urbanization were contributing factors to the rise of eating disorders in Asia<sup>70</sup>. Altogether the current evidence is consistent with a model whereby higher income plays a role in the etiology of AN.

### *Major depressive disorder*

The literature on the relationship between poverty and depression is relatively extensive. Most studies suggest low income or income inequalities as risk factors for depression<sup>71-74</sup>, in line with the causal effect of poverty on MDD here reported. Other poverty aspects like food insecurity, no former education, unemployment, and social-economic deprivation are also associated with depression<sup>75,76</sup>. However, analysis of SD on MDD risk in this study yielded no significant results. That may be due to the composition of the Townsend deprivation index used to measure deprivation in the UK Biobank. Interestingly, quasi-experimental studies on cash transfer programs and antipoverty programs effectively reduced symptoms of depression, providing more support for a causal effect in addition to prevalence or observational studies<sup>77,78</sup>.

### *Schizophrenia*

The existing literature suggests the association between SZ and lower income<sup>79-82</sup>, lower SES<sup>83</sup>, lower employment rate<sup>79,83,84</sup>, and lower educational level<sup>79,83</sup>. According to a longitudinal cohort study in Denmark, the amount of time spent in low-income conditions during childhood is associated with an increased risk of SZ<sup>80</sup>. The same study also revealed an increased risk of SZ for those who experienced a decrease in the parental income during childhood, whereas lower SZ risk was observed for those with upward parental income

mobility, regardless of the baseline parental income at birth<sup>80</sup>. All this evidence provides further support of causal effects of poverty, deprivation, and low HI and OI on SZ. The causal effect of CA on SZ also echoes previous evidence of inequalities in educational attainment and cognitive performance among people with schizophrenia<sup>85</sup>. In addition, consistent with a reverse causal effect of SZ on poverty found in the current study, previous research detected a low employment rate among individuals suffering from SZ, particularly after being diagnosed with the disorder, for these people income transfer payments are usually the main source of income<sup>84</sup>. Low income and deprivation were also acknowledged as severe psychological and physiological stressors able to worsen SZ symptoms<sup>81</sup>, which sustain a negative circle of bidirectional causality.

### *Other disorders*

For the other disorders, the level of consistency across the analyses and previous literature is much lower. The literature on the relationship between poverty and PTSD is very scarce, overall suggesting that low income and material hardship are associated with the development of PTSD among those exposed to traumatic events<sup>86-88</sup>. Moreover, in low- and middle-income countries, most people with PTSD do not access evidence-based treatment<sup>89</sup>. An interesting finding concerns the risk of BD to the level of income. This exhibited a U-shape pattern, with an increased risk of BD for both lower and mid-high levels of income, which is similar to that found for the relationship between BD and intelligence in a previous study<sup>90</sup>. The diagnosis of BD and MDD can be sometimes challenging due to the presence of overlapping symptoms. Therefore, the differential effect of income on these mental illnesses may be a useful insight for future research on their gene-environment underpinnings. The evidence for causal effects of poverty on ANX, ASD, BD, and OCD showed low consistency across sensitivity analyses, partly due to the lower power of the GWAS of ANX and OCD and to possible competing mechanisms and pleiotropic confounders for BD and ASD.

### *Limitations*

This study has limitations that should be considered when interpreting the results. First, for ANX, ASD, MDD, OCD, and PTSD, GWAS sample sizes were relatively small, precluding meaningful MR analysis. Future, more powerful GWAS on these conditions may yield instruments that are suitable for MR. Second, most genetic studies were conducted in populations of European ancestry from high income countries. Generalizability to populations from other ancestries, and to low- and medium-income countries, is therefore uncertain<sup>91</sup>. Particularly, this raises questions about the specificity and universality of the effects of poverty on mental health in different cultures and contexts with different political and social systems. Third, it is well acknowledged that psychiatric phenotypes are complex and heterogeneous, which generally translates to low power. This is reflected by the relatively modest effects of each poverty indicator on mental illness. Fourth, it is essential to acknowledge the potential influence of the dynastic effect, wherein characteristics transmitted across generations may contribute to the observed MR causal estimates. Detecting the exact magnitude of bias resulting from this effect is challenging. Therefore, we advise triangulation of our findings using complementary research methods in future studies. Finally, other limitations of MR concern temporality and linearity: MR is thought to provide estimates of lifetime risk and assumes linear effects. Although the use of MR on HI levels and the inclusion of mental illness with onsets across the whole person's lifespan (e.g., ranging from ADHD and ASD to MDD and ANX) may have mitigated these limitations, future studies should particularly focus on assessing if there are critical windows or acute reactions to poverty exposure.

### *Implications for research and practice*

To the best of our knowledge, this is the first study to provide evidence of a causal effect of poverty on mental illness, using MR. Although individuals' skills and abilities tied to earning capacity may be the variables with the actual causal effect on mental illness, this is a highly relevant message for public health and policy because our findings warrant further investigations into interventions targeting poverty and cognitive abilities to advance mental health. The choice of which action to take to address the problem is a political matter, but attention is warranted considering increasing income inequalities worldwide<sup>92</sup>, as well as increasing incidence of mental illness<sup>93,94</sup>.

Previous studies examining antipoverty programs reported positive and sustained effects on mental health<sup>95</sup>, including reduction of depression and suicide rates<sup>11,96,97</sup>. For example, a recent RCT found that cash incentives provided to low-income individuals led to meaningful improvements in depression<sup>98</sup>. Additionally, specific economic interventions such as family assets, employment support, and rental assistance may be effective in enhancing the mental health of program beneficiaries<sup>99,100</sup>. However, it is important to note that certain aspects of these interventions, such as the perception of receiving money as a debt or burdensome responsibility<sup>101,102</sup>, may contribute to increased stress<sup>103,104</sup>. Therefore, further research is necessary to identify the factors within economic support interventions (e.g., microcredit, loans, personal health budgets) that influence mental health outcomes. Early studies that combined antipoverty interventions, such as financial incentives and financial mentoring programs, appeared more effective in improving mental health compared to providing financial incentives alone<sup>97</sup>. Given these complexities, policymakers could consider policies that can be beneficial both for individuals living in poverty and those living with severe mental illness. Policymakers should also consider a key finding of this study about the effect of cognitive ability in the causal pathway linking poverty to mental illness. CA are closely associated with educational attainment and occupational status, which are often regarded as socio-economic status variables relevant to health<sup>49,51,105</sup>. Although the genetic relationship between CA and mental illness differs from the genetic relationship between education and mental illness, education and occupation may still serve as potential targets for interventions. Future research should explore strategies aimed at facilitating individuals' participation in education and employment, which may lead to better mental health<sup>8,106</sup>.

### *Conclusions*

This study presents evidence supporting causal effects of poverty on mental illness particularly for SZ and MDD. Conversely, AN was found in an inverse causal relationship with poverty, suggesting increased risk of AN among less poor people. Taken together with previous literature this research points to new possibilities for public mental health improvement, a possibility that should be welcomed in an era with increasing health inequalities.

### **Declaration of interests**

There are no conflicts of interest in relation to the subject of this study.

### **Funding**

This research was not funded.

### **Acknowledgement**

Thanks to Prof. Maria Cristina Murari from University of Modena and Reggio Emilia, for the help with HPC.



## Data availability statement

The lead SNPs list and summary statistics of the common factor poverty GWAS is available as Supplementary File 2. The full GWAS summary statistics is available upon reasonable request to the lead author (MM).

The codes for replicating the analyses can be accessed here:

<https://github.com/MattiaMarchi/Common-factor-GWAS---MR>

## References

1. Hollingshead AB, Redlich FC. Social class and mental illness: Community study. *Social class and mental illness: Community study*. Published online February 14, 1958. doi:10.1037/10645-000
2. Chung RYN, Chung GKK, Gordon D, et al. Deprivation is associated with worse physical and mental health beyond income poverty: a population-based household survey among Chinese adults. *Qual Life Res*. 2018;27(8):2127-2135. doi:10.1007/S11136-018-1863-Y
3. Torquati L, Mielke GI, Brown WJ, Burton NW, Kolbe-Alexander TL. Shift Work and Poor Mental Health: A Meta-Analysis of Longitudinal Studies. *Am J Public Health*. 2019;109(11):E13-E20. doi:10.2105/AJPH.2019.305278
4. Rapp MA, Kluge U, Penka S, et al. When local poverty is more important than your income: Mental health in minorities in inner cities. *World Psychiatry*. 2015;14(2):249. doi:10.1002/WPS.20221
5. Price JH, Khubchandani J, Webb FJ. Poverty and Health Disparities: What Can Public Health Professionals Do? *Health Promot Pract*. 2018;19(2):170-174. doi:10.1177/1524839918755143
6. Vaalavuo M. Deterioration in health: What is the role of unemployment and poverty? *Scand J Public Health*. 2016;44(4):347-353. doi:10.1177/1403494815623654
7. Thomson RM, Igelström E, Purba AK, et al. How do income changes impact on mental health and wellbeing for working-age adults? A systematic review and meta-analysis. *Lancet Public Health*. 2022;7(6):e515-e528. doi:10.1016/S2468-2667(22)00058-5
8. Ribeiro WS, Bauer A, Andrade MCR, et al. Income inequality and mental illness-related morbidity and resilience: a systematic review and meta-analysis. *Lancet Psychiatry*. 2017;4(7):554-562. doi:10.1016/S2215-0366(17)30159-1
9. Park AL, Rinaldi M, Brinchmann B, et al. Economic analyses of supported employment programmes for people with mental health conditions: A systematic review. *Eur Psychiatry*. 2022;65(1). doi:10.1192/J.EURPSY.2022.2309
10. Murali V, Oyebode F. Poverty, social inequality and mental health. *Advances in Psychiatric Treatment*. 2004;10(3):216-224. doi:10.1192/APT.10.3.216
11. Ridley M, Rao G, Schilbach F, Patel V. Poverty, depression, and anxiety: Causal evidence and mechanisms. *Science*. 2020;370(6522). doi:10.1126/SCIENCE.AAY0214
12. Wootton RE, Jones HJ, Sallis HM. Mendelian randomisation for psychiatry: how does it work, and what can it tell us? *Molecular Psychiatry* 2021 27:1. 2021;27(1):53-57. doi:10.1038/s41380-021-01173-3
13. Burgess S, Foley CN, Allara E, Staley JR, Howson JMM. A robust and efficient method for Mendelian randomization with hundreds of genetic variants. *Nature Communications* 2020 11:1. 2020;11(1):1-11. doi:10.1038/s41467-019-14156-4
14. Alkire, S., Foster, J. E., Seth, S., Santos, M. E., Roche, J. M., and Ballon P. *Multidimensional Poverty Measurement and Analysis*.; 2015.



15. Galobardes B, Shaw M, Lawlor DA, Lynch JW, Smith GD. Indicators of socioeconomic position (part 2). *J Epidemiol Community Health* (1978). 2006;60(2):95-101. doi:10.1136/jech.2004.028092
16. Galobardes B, Shaw M, Lawlor DA, Lynch JW, Smith GD. Indicators of socioeconomic position (part 1). *J Epidemiol Community Health* (1978). 2006;60(1):7-12. doi:10.1136/JECH.2004.023531
17. Johnson S, Dalton-Locke C, Baker J, et al. Acute psychiatric care: approaches to increasing the range of services and improving access and quality of care. *World Psychiatry*. 2022;21(2):220. doi:10.1002/WPS.20962
18. Townsend P, Phillimore P, Beattie Alastair. Health and deprivation: inequality and the North. Published online 1988:211.
19. Burgess S, Thompson SG. Multivariable Mendelian randomization: the use of pleiotropic genetic variants to estimate causal effects. *Am J Epidemiol*. 2015;181(4):251-260. doi:10.1093/AJE/KWU283
20. Hill WD, Marioni RE, Maghziyan O, et al. A combined analysis of genetically correlated traits identifies 187 loci and a role for neurogenesis and myelination in intelligence. *Molecular Psychiatry* 2018 24:2. 2018;24(2):169-181. doi:10.1038/s41380-017-0001-5
21. Johnson W, Nijenhuis J te, Bouchard TJ. Still just 1 g: Consistent results from five test batteries. *Intelligence*. 2008;36(1):81-95. doi:10.1016/J.INTELL.2007.06.001
22. Johnson W, Bouchard TJ, Krueger RF, McGue M, Gottesman II. Just one g: consistent results from three test batteries. *Intelligence*. 2004;32(1):95-107. doi:10.1016/S0160-2896(03)00062-X
23. Kweon H, Burik CAP, Linner RK, et al. Genetic Fortune: Winning or Losing Education, Income, and Health. Published online December 1, 2020. Accessed December 3, 2022. <https://EconPapers.repec.org/RePEc:tin:wpaper:20200053>
24. Bulik-Sullivan B, Loh PR, Finucane HK, et al. LD Score regression distinguishes confounding from polygenicity in genome-wide association studies. *Nature Genetics* 2015 47:3. 2015;47(3):291-295. doi:10.1038/ng.3211
25. Demontis D, Walters GB, Athanasiadis G, et al. Genome-wide analyses of ADHD identify 27 risk loci, refine the genetic architecture and implicate several cognitive domains. *Nat Genet*. 2023;55(2):198-208. doi:10.1038/S41588-022-01285-8
26. Watson HJ, Yilmaz Z, Thornton LM, et al. Genome-wide association study identifies eight risk loci and implicates metabo-psychiatric origins for anorexia nervosa. *Nat Genet*. 2019;51(8):1207-1214. doi:10.1038/S41588-019-0439-2
27. Otowa T, Hek K, Lee M, et al. Meta-analysis of genome-wide association studies of anxiety disorders. *Mol Psychiatry*. 2016;21(10):1391-1399. doi:10.1038/MP.2015.197
28. Grove J, Ripke S, Als TD, et al. Identification of common genetic risk variants for autism spectrum disorder. *Nat Genet*. 2019;51(3):431-444. doi:10.1038/S41588-019-0344-8
29. Mullins N, Forstner AJ, O'Connell KS, et al. Genome-wide association study of more than 40,000 bipolar disorder cases provides new insights into the underlying biology. *Nat Genet*. 2021;53(6):817-829. doi:10.1038/S41588-021-00857-4
30. Howard DM, Adams MJ, Clarke TK, et al. Genome-wide meta-analysis of depression identifies 102 independent variants and highlights the importance of the prefrontal brain regions. *Nat Neurosci*. 2019;22(3):343-352. doi:10.1038/S41593-018-0326-7
31. Arnold PD, Askland KD, Barlassina C, et al. Revealing the complex genetic architecture of obsessive-compulsive disorder using meta-analysis. *Mol Psychiatry*. 2018;23(5):1181-1188. doi:10.1038/MP.2017.154

32. Nievergelt CM, Maihofer AX, Klengel T, et al. International meta-analysis of PTSD genome-wide association studies identifies sex- and ancestry-specific genetic risk loci. *Nat Commun*. 2019;10(1). doi:10.1038/S41467-019-12576-W
33. Trubetskoy V, Pardiñas AF, Qi T, et al. Mapping genomic loci implicates genes and synaptic biology in schizophrenia. *Nature* 2022 604:7906. 2022;604(7906):502-508. doi:10.1038/s41586-022-04434-5
34. Burgess S, Davies NM, Thompson SG. Bias due to participant overlap in two-sample Mendelian randomization. *Genet Epidemiol*. 2016;40(7):597-608. doi:10.1002/GEPI.21998
35. Lawlor DA, Harbord RM, Sterne JAC, Timpson N, Smith GD. Mendelian randomization: using genes as instruments for making causal inferences in epidemiology. *Stat Med*. 2008;27(8):1133-1163. doi:10.1002/SIM.3034
36. Bowden J, Davey Smith G, Haycock PC, Burgess S. Consistent Estimation in Mendelian Randomization with Some Invalid Instruments Using a Weighted Median Estimator. *Genet Epidemiol*. 2016;40(4):304-314. doi:10.1002/GEPI.21965
37. Bowden J, Smith GD, Burgess S. Mendelian randomization with invalid instruments: effect estimation and bias detection through Egger regression. *Int J Epidemiol*. 2015;44(2):512-525. doi:10.1093/IJE/DYV080
38. Verbanck M, Chen CY, Neale B, Do R. Detection of widespread horizontal pleiotropy in causal relationships inferred from Mendelian randomization between complex traits and diseases. *Nature Genetics* 2018 50:5. 2018;50(5):693-698. doi:10.1038/s41588-018-0099-7
39. Morrison J, Knoblauch N, Marcus JH, Stephens M, He X. Mendelian randomization accounting for correlated and uncorrelated pleiotropic effects using genome-wide summary statistics. *Nature Genetics* 2020 52:7. 2020;52(7):740-747. doi:10.1038/s41588-020-0631-4
40. Hemani G, Tilling K, Davey Smith G. Orienting the causal relationship between imprecisely measured traits using GWAS summary data. *PLoS Genet*. 2017;13(11). doi:10.1371/JOURNAL.PGEN.1007081
41. Bowden J, Fabiola Del Greco M, Minelli C, Smith GD, Sheehan NA, Thompson JR. Assessing the suitability of summary data for two-sample Mendelian randomization analyses using MR-Egger regression: the role of the I<sup>2</sup> statistic. *Int J Epidemiol*. 2016;45(6):1961-1974. doi:10.1093/IJE/DYW220
42. RStudio Team. RStudio: Integrated Development Environment for R. Published online 2022. <http://www.rstudio.com/>
43. Hemani G, Zheng J, Elsworth B, et al. The MR-Base platform supports systematic causal inference across the human phenome. *Elife*. 2018;7. doi:10.7554/ELIFE.34408
44. Grotzinger AD, Rhemtulla M, de Vlaming R, et al. Genomic SEM Provides Insights into the Multivariate Genetic Architecture of Complex Traits. *Nat Hum Behav*. 2019;3(5):513. doi:10.1038/S41562-019-0566-X
45. Hill WD, Davies NM, Ritchie SJ, et al. Genome-wide analysis identifies molecular systems and 149 genetic loci associated with income. *Nature Communications* 2019 10:1. 2019;10(1):1-16. doi:10.1038/s41467-019-13585-5
46. Lee J. Maternal Economic Well-Being and Mental Health among Young Adult Children: Race/Ethnicity. *Int J Environ Res Public Health*. 2021;18(11). doi:10.3390/IJERPH18115691
47. Lin B, Okyere MA. Multidimensional Energy Poverty and Mental Health: Micro-Level Evidence from Ghana. *International Journal of Environmental Research and Public Health* 2020, Vol 17, Page 6726. 2020;17(18):6726. doi:10.3390/IJERPH17186726

48. van Rheeën W, Peyrot WJ, Schork AJ, Lee SH, Wray NR. Genetic correlations of polygenic disease traits: from theory to practice. *Nature Reviews Genetics* 2019 20:10. 2019;20(10):567-581. doi:10.1038/s41576-019-0137-z
49. Singh-Manoux A, Ferrie JE, Lynch JW, Marmot M. The role of cognitive ability (intelligence) in explaining the association between socioeconomic position and health: evidence from the Whitehall II prospective cohort study. *Am J Epidemiol.* 2005;161(9):831-839. doi:10.1093/AJE/KWI109
50. Batty GD, Deary IJ, Gottfredson LS. Premorbid (early life) IQ and later mortality risk: systematic review. *Ann Epidemiol.* 2007;17(4):278-288. doi:10.1016/J.ANNEPIDEM.2006.07.010
51. Batty GD, Deary IJ. Early life intelligence and adult health: Associations, plausible mechanisms, and public health importance are emerging. *BMJ* □: *British Medical Journal.* 2004;329(7466):585. doi:10.1136/BMJ.329.7466.585
52. Deary IJ, Hill WD, Gale CR. Intelligence, health and death. *Nature Human Behaviour* 2021 5:4. 2021;5(4):416-430. doi:10.1038/s41562-021-01078-9
53. Pettersson E, Larsson H, D'Onofrio BM, Bölte S, Lichtenstein P. The general factor of psychopathology: a comparison with the general factor of intelligence with respect to magnitude and predictive validity. *World Psychiatry.* 2020;19(2):206-213. doi:10.1002/WPS.20763
54. Han E, Norton EC, Stearns SC. Weight and wages: fat versus lean paychecks. *Health Econ.* 2009;18(5):535-548. doi:10.1002/HEC.1386
55. Judge TA, Hurst C, Simon LS. Does It Pay to Be Smart, Attractive, or Confident (or All Three)? Relationships Among General Mental Ability, Physical Attractiveness, Core Self-Evaluations, and Income. *Journal of Applied Psychology.* 2009;94(3):742-755. doi:10.1037/A0015497
56. Brouwers EPM. Social stigma is an underestimated contributing factor to unemployment in people with mental illness or mental health issues: position paper and future directions. *BMC Psychol.* 2020;8(1). doi:10.1186/S40359-020-00399-0
57. Morris JN, Donkin AJM, Wonderling D, Wilkinson P, Dowler EA. A minimum income for healthy living. *J Epidemiol Community Health (1978).* 2000;54(12):885-889. doi:10.1136/JECH.54.12.885
58. Evans GW, Kantrowitz E. Socioeconomic status and health: the potential role of environmental risk exposure. *Annu Rev Public Health.* 2002;23:303-331. doi:10.1146/ANNUREV.PUBLHEALTH.23.112001.112349
59. Evans GW, English K. The environment of poverty: multiple stressor exposure, psychophysiological stress, and socioemotional adjustment. *Child Dev.* 2002;73(4):1238-1248. doi:10.1111/1467-8624.00469
60. Montagud-Romero S, Miñarro J, Rodríguez-Arias M. Unravelling the Neuroinflammatory Mechanisms Underlying the Effects of Social Defeat Stress on Use of Drugs of Abuse. *Curr Top Behav Neurosci.* 2022;54:153-180. doi:10.1007/7854\_2021\_260
61. Mackenbach JP, Stirbu I, Roskam AJR, et al. Socioeconomic inequalities in health in 22 European countries. *N Engl J Med.* 2008;358(23):2468-2481. doi:10.1056/NEJMSA0707519
62. Raphael D, Macdonald J, Colman R, Labonte R, Hayward K, Torgerson R. Researching income and income distribution as determinants of health in Canada: gaps between theoretical knowledge, research practice, and policy implementation. *Health Policy.* 2005;72(2):217-232. doi:10.1016/J.HEALTHPOL.2004.08.001

63. Cesarini Erik Lindqvist Robert DO, Bjö m Wallace stling, Benjamin D, et al. Wealth, Health, and Child Development: Evidence from Administrative Data on Swedish Lottery Players. *Q J Econ.* 2016;131(2):687-738. doi:10.1093/QJE/QJW001
64. Marryat L, Thompson L, Minnis H, Wilson P. Primary schools and the amplification of social differences in child mental health: a population-based cohort study. *J Epidemiol Community Health (1978)*. 2018;72(1):27-33. doi:10.1136/JECH-2017-208995
65. Duncan GJ, Morris PA, Rodrigues C. Does money really matter? Estimating impacts of family income on young children’s achievement with data from random-assignment experiments. *Dev Psychol.* 2011;47(5):1263-1279. doi:10.1037/A0023875
66. Qian J, Wu Y, Liu F, et al. An update on the prevalence of eating disorders in the general population: a systematic review and meta-analysis. *Eat Weight Disord.* 2022;27(2):415-428. doi:10.1007/S40519-021-01162-Z
67. Koch SV, Larsen JT, Plessen KJ, Thornton LM, Bulik CM, Petersen LV. Associations between parental socioeconomic-, family-, and sibling status and risk of eating disorders in offspring in a Danish national female cohort. *Int J Eat Disord.* 2022;55(8):1130-1142. doi:10.1002/EAT.23771
68. Hay P, Girosi F, Mond J. Prevalence and sociodemographic correlates of DSM-5 eating disorders in the Australian population. *J Eat Disord.* 2015;3(1). doi:10.1186/S40337-015-0056-0
69. Presskreischer R, Steinglass JE, Anderson KE. Eating disorders in the U.S. Medicare population. *Int J Eat Disord.* 2022;55(3):362-371. doi:10.1002/EAT.23676
70. Pike KM, Dunne PE. The rise of eating disorders in Asia: a review. *J Eat Disord.* 2015;3(1). doi:10.1186/S40337-015-0070-2
71. Melchior M, Chastang JF, Walburg V, Arseneault L, Galéra C, Fombonne E. Family income and youths’ symptoms of depression and anxiety: a longitudinal study of the French GAZEL Youth cohort. *Depress Anxiety.* 2010;27(12):1095-1103. doi:10.1002/DA.20761
72. Hakulinen C, Musliner KL, Agerbo E. Bipolar disorder and depression in early adulthood and long-term employment, income, and educational attainment: A nationwide cohort study of 2,390,127 individuals. *Depress Anxiety.* 2019;36(11):1080-1088. doi:10.1002/DA.22956
73. Dismuke CE, Egede LE. Association between major depression, depressive symptoms and personal income in US adults with diabetes. *Gen Hosp Psychiatry.* 2010;32(5):484-491. doi:10.1016/J.GENHOSPPSYCH.2010.06.004
74. Patel V, Burns JK, Dhingra M, Tarver L, Kohrt BA, Lund C. Income inequality and depression: a systematic review and meta-analysis of the association and a scoping review of mechanisms. *World Psychiatry.* 2018;17(1):76-89. doi:10.1002/WPS.20492
75. Kinyanda E, Woodburn P, Tugumisirize J, Kagugube J, Ndyababangi S, Patel V. Poverty, life events and the risk for depression in Uganda. *Soc Psychiatry Psychiatr Epidemiol.* 2011;46(1):35-44. doi:10.1007/S00127-009-0164-8
76. Huddleston-Casas C, Charnigo R, Simmons LA. Food insecurity and maternal depression in rural, low-income families: a longitudinal investigation. *Public Health Nutr.* 2009;12(8):1133-1140. doi:10.1017/S1368980008003650
77. Powell-Jackson T, Pereira SK, Dutt V, Tougher S, Halder K, Kumar P. Cash transfers, maternal depression and emotional well-being: Quasi-experimental evidence from India’s Janani Suraksha Yojana programme. *Soc Sci Med.* 2016;162:210-218. doi:10.1016/J.SOCSCIMED.2016.06.034
78. Ozer EJ, Fernald LCH, Weber A, Flynn EP, VanderWeele TJ. Does alleviating poverty affect mothers’ depressive symptoms? A quasi-experimental investigation of Mexico’s



- Oportunidades programme. *Int J Epidemiol.* 2011;40(6):1565-1576.  
doi:10.1093/IJE/DYR103
79. Hakulinen C, McGrath JJ, Timmerman A, et al. The association between early-onset schizophrenia with employment, income, education, and cohabitation status: nationwide study with 35 years of follow-up. *Soc Psychiatry Psychiatr Epidemiol.* 2019;54(11):1343-1351. doi:10.1007/S00127-019-01756-0
  80. Hakulinen C, Webb RT, Pedersen CB, Agerbo E, Mok PLH. Association Between Parental Income During Childhood and Risk of Schizophrenia Later in Life. *JAMA Psychiatry.* 2020;77(1):17-24. doi:10.1001/JAMAPSYCHIATRY.2019.2299
  81. Schneider M, Müller CP, Knies AK. Low income and schizophrenia risk: A narrative review. *Behavioural brain research.* 2022;435. doi:10.1016/J.BBR.2022.114047
  82. Yu YH, Peng MM, Bai X, et al. Schizophrenia, social support, caregiving burden and household poverty in rural China. *Soc Psychiatry Psychiatr Epidemiol.* 2020;55(12):1571-1580. doi:10.1007/S00127-020-01864-2
  83. Cohen CI. Poverty and the course of schizophrenia: implications for research and policy. *Hosp Community Psychiatry.* 1993;44(10):951-957. doi:10.1176/PS.44.10.951
  84. Hakulinen C, Elovainio M, Arffman M, et al. Employment Status and Personal Income Before and After Onset of a Severe Mental Disorder: A Case-Control Study. *Psychiatr Serv.* 2020;71(3):250-255. doi:10.1176/APPI.PS.201900239
  85. Crossley NA, Allende LM, Czepielewski LS, et al. The enduring gap in educational attainment in schizophrenia according to the past 50 years of published research: a systematic review and meta-analysis. *Lancet Psychiatry.* 2022;9(7):565-573. doi:10.1016/S2215-0366(22)00121-3
  86. Holmes SC, Callinan L, Facemire VC, Williams MT, Ciarleglio MM, Smith M V. Material hardship is associated with posttraumatic stress disorder symptoms among low-income Black women. *J Trauma Stress.* 2021;34(5):905-916. doi:10.1002/JTS.22741
  87. Lenart EK, Bee TK, Seger CP, et al. Youth, poverty, and interpersonal violence: a recipe for PTSD. *Trauma Surg Acute Care Open.* 2021;6(1). doi:10.1136/TSACO-2021-000710
  88. Marchi M, Magarini FM, Chiarenza A, et al. Experience of discrimination during COVID-19 pandemic: the impact of public health measures and psychological distress among refugees and other migrants in Europe. *BMC Public Health.* 2022;22(1). doi:10.1186/S12889-022-13370-Y
  89. Bryant RA. Post-traumatic stress disorder: a state-of-the-art review of evidence and challenges. *World Psychiatry.* 2019;18(3):259-269. doi:10.1002/WPS.20656
  90. Gale CR, Batty GD, Mcintosh AM, Porteous DJ, Deary IJ, Rasmussen F. Is bipolar disorder more common in highly intelligent people? A cohort study of a million men. *Molecular Psychiatry* 2013 18:2. 2012;18(2):190-194. doi:10.1038/mp.2012.26
  91. Mills MC, Rahal C. A scientometric review of genome-wide association studies. *Communications Biology* 2019 2:1. 2019;2(1):1-11. doi:10.1038/s42003-018-0261-x
  92. Schorrocks A, Davies JB LR. *Global Wealth Report 2022.*; 2022. <https://www.credit-suisse.com/media/assets/corporate/docs/about-us/research/publications/global-wealth-report-2020-en.pdf>
  93. The WHO special initiative for mental health (2019-2023): universal health coverage for mental health. Accessed January 27, 2023. <https://apps.who.int/iris/handle/10665/310981>
  94. Global, regional, and national burden of 12 mental disorders in 204 countries and territories, 1990-2019: a systematic analysis for the Global Burden of Disease Study 2019. *Lancet Psychiatry.* 2022;9(2):137-150. doi:10.1016/S2215-0366(21)00395-3

95. Zimmerman A, Garman E, Avendano-Pabon M, et al. The impact of cash transfers on mental health in children and young people in low-income and middle-income countries: a systematic review and meta-analysis. *BMJ Glob Health*. 2021;6(4):e004661. doi:10.1136/BMJGH-2020-004661
96. Bauer A, Garman E, McDaid D, et al. Integrating youth mental health into cash transfer programmes in response to the COVID-19 crisis in low-income and middle-income countries. *Lancet Psychiatry*. 2021;8(4):340-346. doi:10.1016/S2215-0366(20)30382-5
97. Ohrnberger J, Fichera E, Sutton M, Anselmi L. The effect of cash transfers on mental health-new evidence from South Africa. *BMC Public Health*. 2020;20(1):1-13. doi:10.1186/S12889-020-08596-7/TABLES/4
98. Bradley CJ, Saunders HG. Impact of cash incentives for low-income individuals to seek a primary care visit on mental health outcomes: Evidence from a randomized controlled trial. *Soc Sci Med*. 2020;265. doi:10.1016/J.SOCSCIMED.2020.113515
99. Denary W, Fenelon A, Schlesinger P, Purtle J, Blankenship KM, Keene DE. Does rental assistance improve mental health? Insights from a longitudinal cohort study. *Soc Sci Med*. 2021;282. doi:10.1016/J.SOCSCIMED.2021.114100
100. Cavazos-Rehg P, Byansi W, Doroshenko C, et al. Evaluating potential mediators for the impact of a family-based economic intervention (Suubi+Adherence) on the mental health of adolescents living with HIV in Uganda. *Soc Sci Med*. 2021;280:113946. doi:10.1016/J.SOCSCIMED.2021.113946
101. Micai M, Gila L, Caruso A, et al. Benefits and challenges of a personal budget for people with mental health conditions or intellectual disability: A systematic review. *Front Psychiatry*. 2022;13:1733. doi:10.3389/FPSYT.2022.974621/BIBTEX
102. Ibrahim F, McHugh N, Biosca O, Baker R, Laxton T, Donaldson C. Microcredit as a public health initiative? Exploring mechanisms and pathways to health and wellbeing. *Soc Sci Med*. 2021;270:113633. doi:10.1016/J.SOCSCIMED.2020.113633
103. Fernald LCH, Hamad R, Karlan D, Ozer EJ, Zinman J. Small individual loans and mental health: A randomized controlled trial among South African adults. *BMC Public Health*. 2008;8(1):1-14. doi:10.1186/1471-2458-8-409/FIGURES/2
104. Plagerson S, Patel V, Harpham T, Kielmann K, Mathee A. Does money matter for mental health? Evidence from the Child Support Grants in Johannesburg, South Africa. <https://doi.org/10.1080/174416922010516267>. 2010;6(7):760-776. doi:10.1080/17441692.2010.516267
105. Batty GD, Der G, Macintyre S, Deary IJ. Does IQ explain socioeconomic inequalities in health? Evidence from a population based cohort study in the west of Scotland. *BMJ*. 2006;332(7541):580-583. doi:10.1136/BMJ.38723.660637.AE
106. Nations U. 70/1. Transforming our world: the 2030 Agenda for Sustainable Development Transforming our world: the 2030 Agenda for Sustainable Development Preamble. Published online 2030.
